# Supplementary material for: Reducing systematic review burden using Deduklick: a novel, automated, reliable, and explainable deduplication algorithm to foster medical research
Source: PubMed Central journal article supplement (PMC9382798; doi:10.1186/s13643-022-02045-9), 2022-08-17
Supplement: 13643_2022_2045_MOESM1_ESM.pdf [file 13643_2022_2045_MOESM1_ESM.pdf]

## Database Ranking

| Rank | Database name         |
|------|-----------------------|
| 1    | Medline               |
| 2    | Embase                |
| 3    | Psycinfo              |
| 4    | Eric                  |
| 5    | Pubmed                |
| 6    | Cinahl                |
| 7    | Web of Science        |
| 8    | Scopus                |
| 9    | Proquest              |
| 10   | Cochrane Reviews      |
| 11   | Cochrane Central      |
| 12   | Lilacs                |
| 13   | Global Index Medicus  |
| 14   | African Index Medicus |
| 15   | SciELO                |
| 16   | ClinicalTrials.gov    |
| 17   | WHO ICTRP             |
| 18   | Dimensions            |
| 19   | Epistemonikos         |
| 20   | Google Scholar        |
