# Supplementary material for: Reducing systematic review burden using Deduklick: a novel, automated, reliable, and explainable deduplication algorithm to foster medical research
Source: PubMed Central journal article supplement (PMC9382798; doi:10.1186/s13643-022-02045-9), 2022-08-17
Supplement: 13643_2022_2045_MOESM2_ESM.pdf [file 13643_2022_2045_MOESM2_ESM.pdf]

| Metric               | Description                                                                             |
|----------------------|-----------------------------------------------------------------------------------------|
| True Positives       | Number of correctly identified duplicate references removed from the dataset            |
| True Negatives       | Number of references that should and do remain present in the dataset                   |
| False Positives      | Unique references wrongly identified as duplicates and removed from the dataset         |
| False Negatives      | References which remain in the dataset, but should have been removed as duplicates      |
| Precision            | $\frac{\textit{True Positives}}{\textit{True Positives} + \textit{False Positives}}$    |
| Recall (Sensitivity) | $\frac{\textit{True Positives}}{\textit{True Positives} + \textit{False Negatives}}$    |
| F <sub>1</sub> Score | $\frac{2 * \textit{Precision} * \textit{Recall}}{\textit{Precision} + \textit{Recall}}$ |
